# Supplementary material
Source: Springer Nature journal article supplement (https://www.springermedizin.de/resource/supplementary/13058_2012_3138_MOESM2_ESM.pdf/9703154)

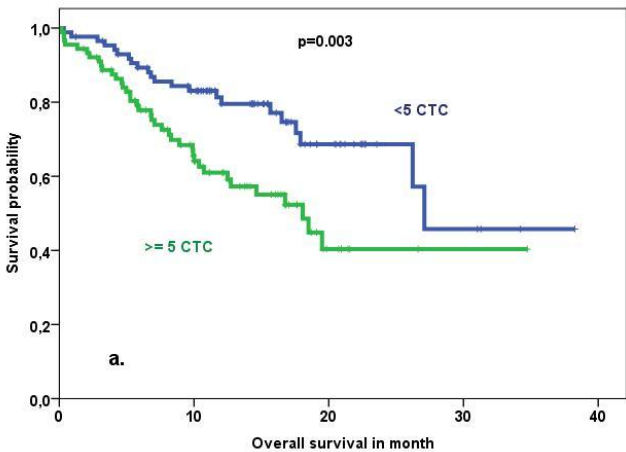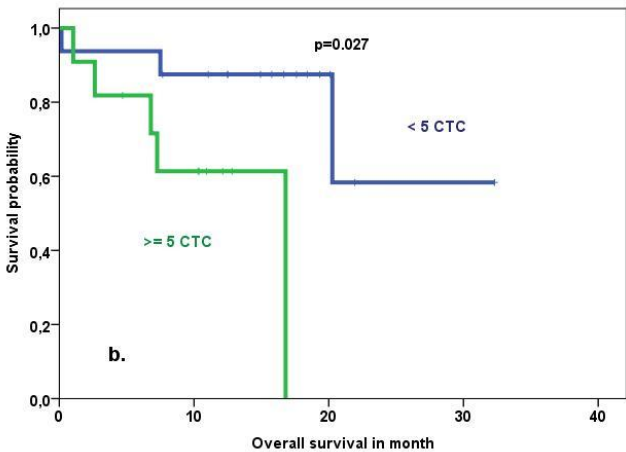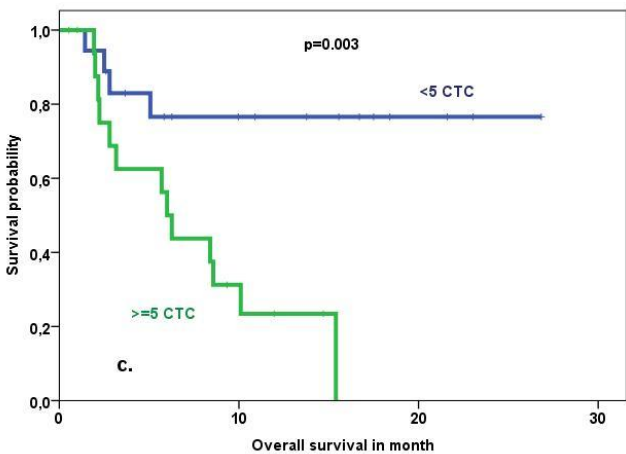

Supplement: MOESM2 [file 9703154]
